# Supplementary material for: Reaction strategies of bisphenol A derivatives to regulate the microstructure of polyarylates: synthesis of bisphenol S/bisphenol A random polyarylates and block polyarylates
Source: Royal Society of Chemistry journal article supplement (doi:10.1039/d4nj01277a), 2024-01-01
Supplement: d4nj01277a1.pdf [file d4nj01277a1.pdf]

## Reaction strategies of bisphenol A derivatives to regulate the microstructure of polyarylates: Synthesis of bisphenol S/bisphenol A random polyarylates and block polyarylates

Zhoufeng Wang<sup>a,b\*</sup>, Bolin Wang<sup>b</sup>, Yingying Liu<sup>b</sup>, Xiubo Long<sup>a,b</sup>, Wenlong Yao<sup>a,b</sup>,

*a. Anhui Province Key Laboratory of Specialty Polymers (Anhui University of Science & Technology), Huainan 232001, PR China*

*b. School of Materials Science and Engineering, Anhui University of Science and Technology, Huainan 232001, PR China*

\*Corresponding Author: Zhoufeng Wang

.E-mail: zfwang@aust.edu.cn.

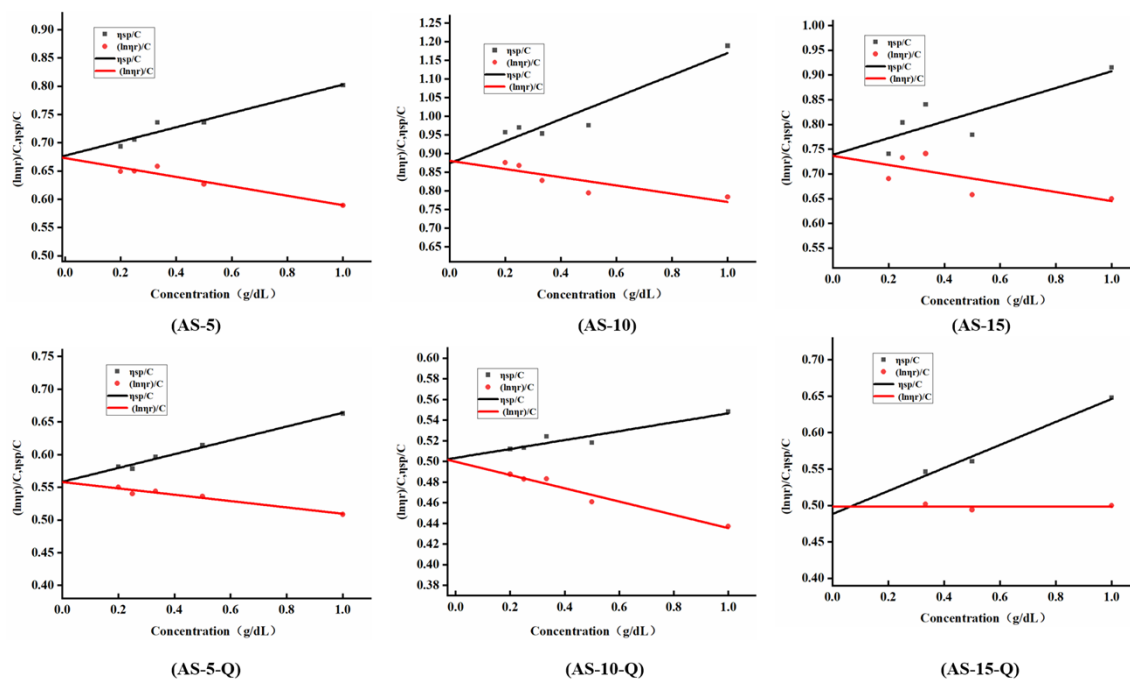

Figure S1 Ubbelohde Viscosity Curve for random polyarylates and block polyarylates

\* Corresponding author: Zhoufeng Wang. E-mail: zfwang@aust.edu.cn.

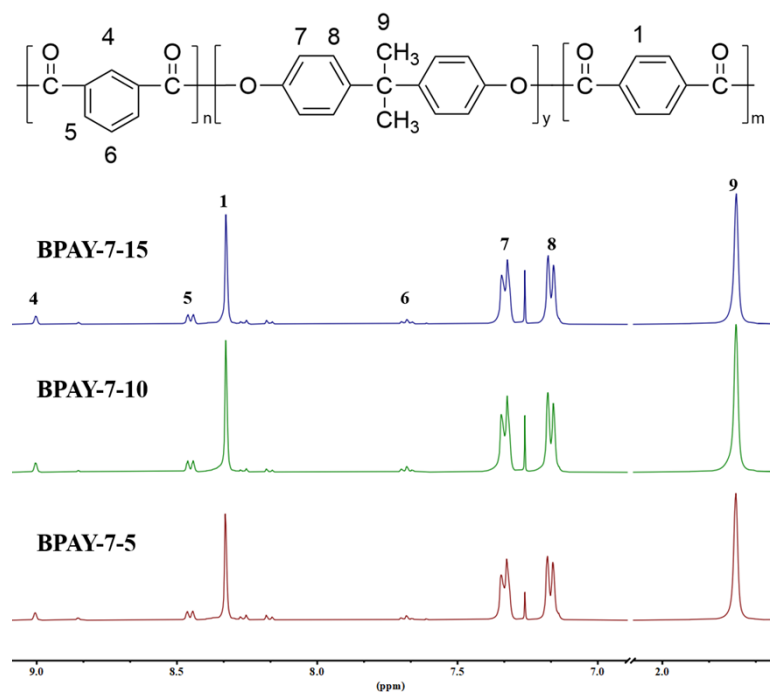

**Figure S2**  $^1\text{H NMR}$  spectrum of the BPA prepolymers

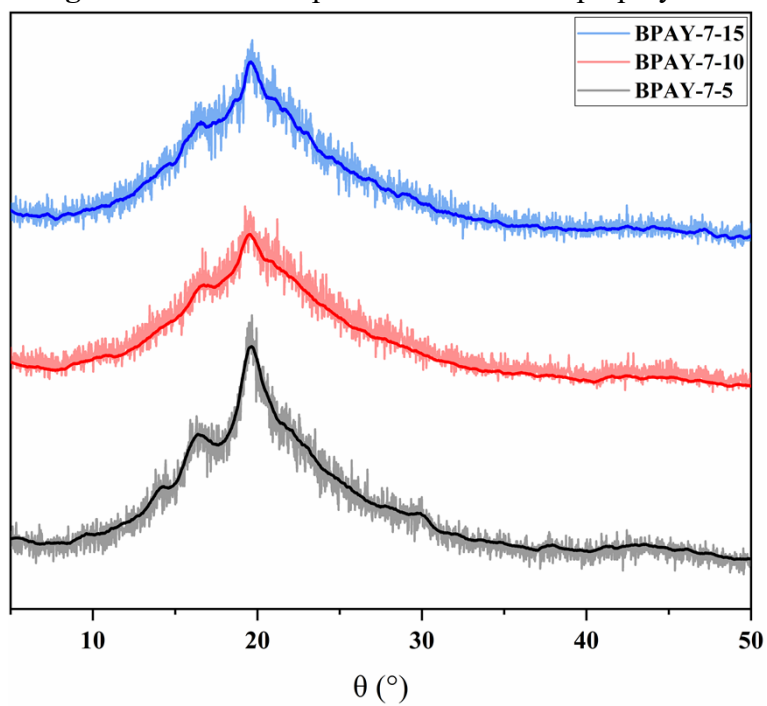

**Figure S3** WAXRD diffraction patterns of the BPA prepolymers

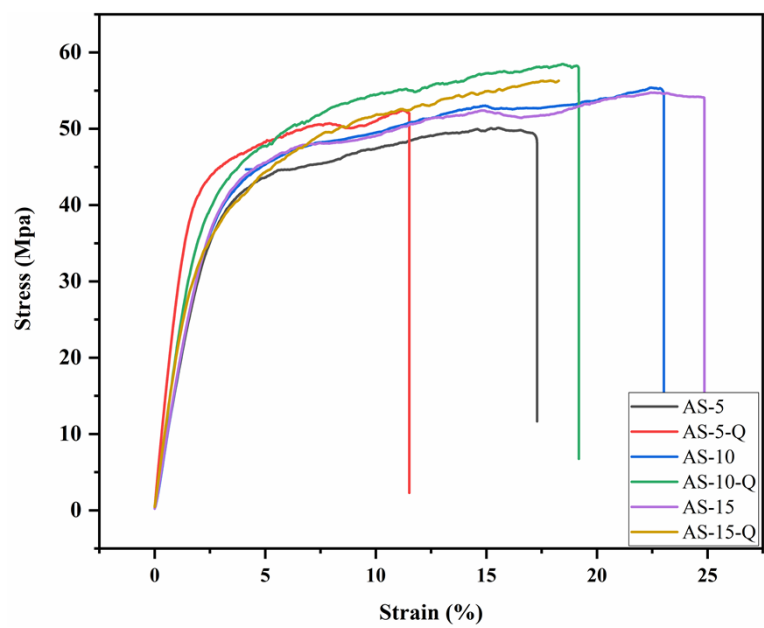

**Figure S4** Film Stretch Curve for random polyarylates and block polyarylates
